# Supplementary material for: Conditioning ensemble streamflow prediction with the North Atlantic Oscillation improves skill at longer lead times
Source: Copernicus journal article supplement (doi:10.5194/hess-25-4159-2021), 2021-07-22
Supplement: Supplementary file 1 [file hess-25-4159-2021-supplement.zip]

Archive with 2 entries (2 files):
- Table_S1.xlsx
- hess-25-4159-2021-supplement-title-page.pdf
