# Supplementary material for: Conditioning ensemble streamflow prediction with the North Atlantic Oscillation improves skill at longer lead times
Source: Copernicus journal article supplement (doi:10.5194/hess-25-4159-2021), 2021-07-22
Supplement: Supplementary file 1 [file hess-25-4159-2021-supplement.zip › hess-25-4159-2021-supplement-title-page.pdf]

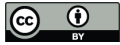

*Supplement of*

## **Conditioning ensemble streamflow prediction with the North Atlantic Oscillation improves skill at longer lead times**

**Seán Donegan et al.**

*Correspondence to:* Seán Donegan ([sean.donegan@mu.ie](mailto:sean.donegan@mu.ie))

- [hess-25-4159-2021-supplement-title-page.pdf](#)
- [Table\\_S1.xlsx](#)

The copyright of individual parts of the supplement might differ from the article licence.
